# Supplementary material
Source: publisher figshare collection journal article supplement (https://acs.figshare.com/ndownloader/files/4288363)
Supplement: Supplementary file 1 [file 4288363]

## Supporting Material

### Proton Transfer between Tryptophan and Ionic Liquid Solvents Studied with Molecular Dynamics Simulations

Marco Klähn,\* Abirami Seduraman and Ping Wu

*Institute of High Performance Computing, 1 Fusionopolis Way, #16-16, Connexis, Singapore 138632, Rep. of Singapore*

\* To whom correspondence should be addressed. Phone: (65) 6419 1468. Fax: (65) 6463 2536.  
E-mail: marco@ihpc.a-star.edu.sg.

**TABLE S1: Solvation Free Energies of HTrp<sup>+</sup> in BMIM-PF<sub>6</sub> from Simulations that Contained Only One Solute**

| Replica no. | $\Delta G_{solv}^{IL}$ |
|-------------|------------------------|
|             | [kcal/mol]             |
| 1           | -88.1                  |
| 2           | -85.5                  |
| 3           | -94.6                  |
| 4           | -89.3                  |
| 5           | -89.0                  |
| 6           | -90.1                  |
| 7           | -83.9                  |
| 8           | -91.5                  |
| 9           | -94.7                  |
| 10          | -87.6                  |
| average     | $-89.4 \pm 1.1^a$      |

<sup>a</sup> The solvation free energy of HTrp<sup>+</sup> in BMIM-PF<sub>6</sub> that was obtained from simulations in which ten solutes were decoupled from the solvent simultaneously was -88.3 kcal/mol (unscaled value) for comparison. This confirms that for the calculation of solvation free energies interactions among the solutes were negligible.

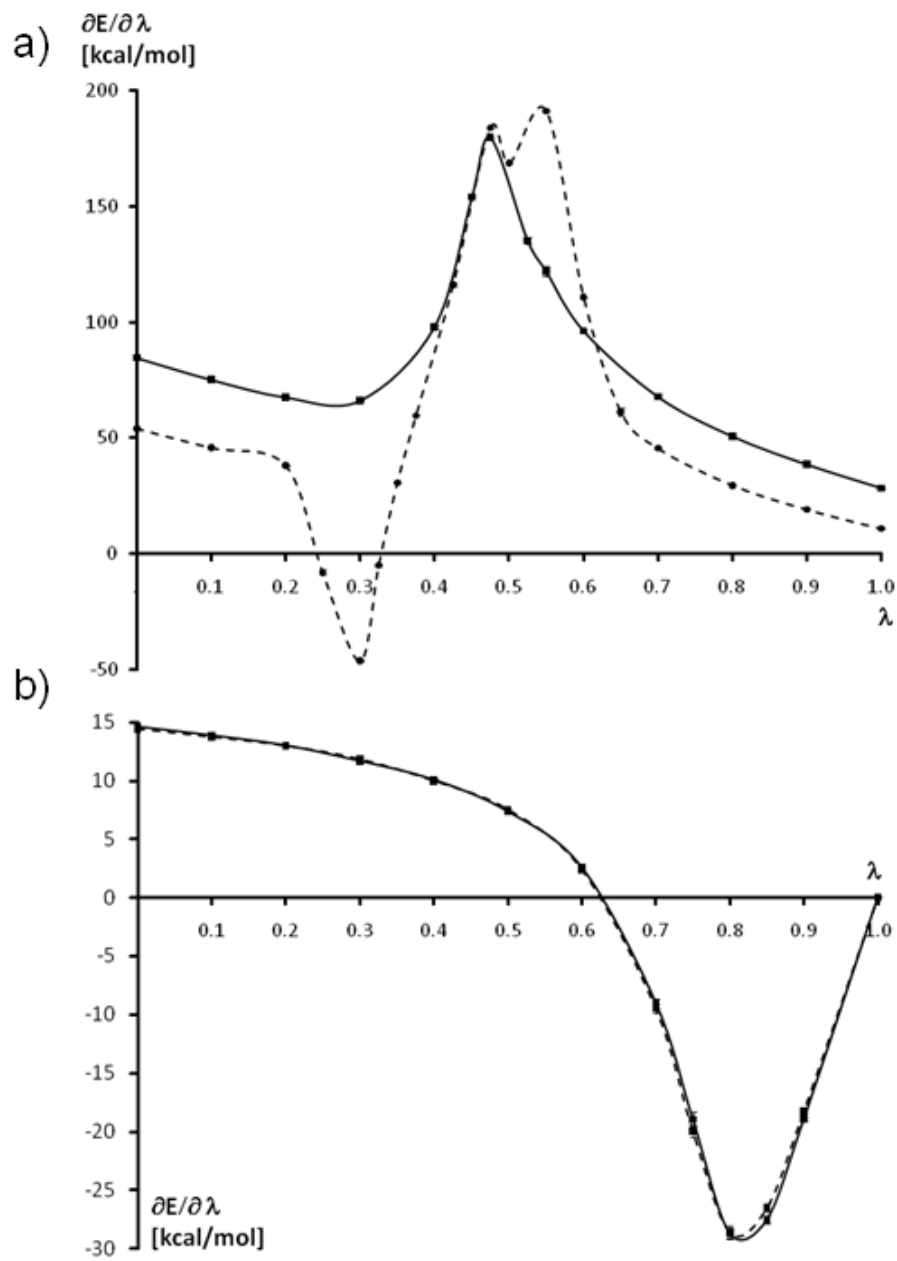

**Figure S1.** Values of  $\partial E / \partial \lambda$  as a function of  $\lambda$  for the Coulomb contribution (a) and the van der Waals contribution (b) of  $\text{HTrp}^+$  (straight line) and  $\text{Trp}$  (broken line) in water. Integrals of these curves were used to determine the solvation free energy. Error bars were omitted because they were too small to be discernible.

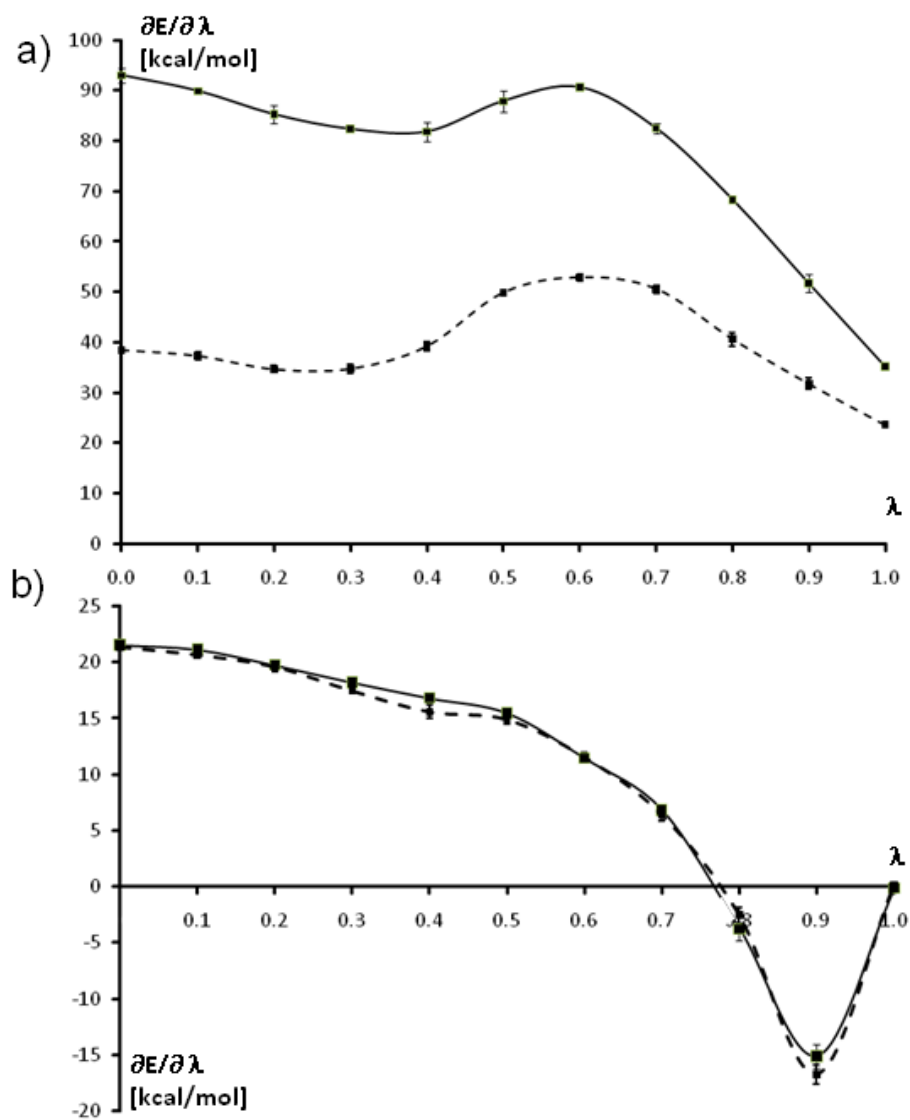

**Figure S2.** Values of  $\partial E / \partial \lambda$  as a function of  $\lambda$  for the Coulomb contribution (a) and the van der Waals contribution (b) of  $\text{HTrp}^+$  (straight line) and  $\text{Trp}$  (broken line) in BMIM- $\text{PF}_6$ . Integrals of these curves were used to determine the solvation free energy. Error bars are displayed for each  $\lambda$ -point.

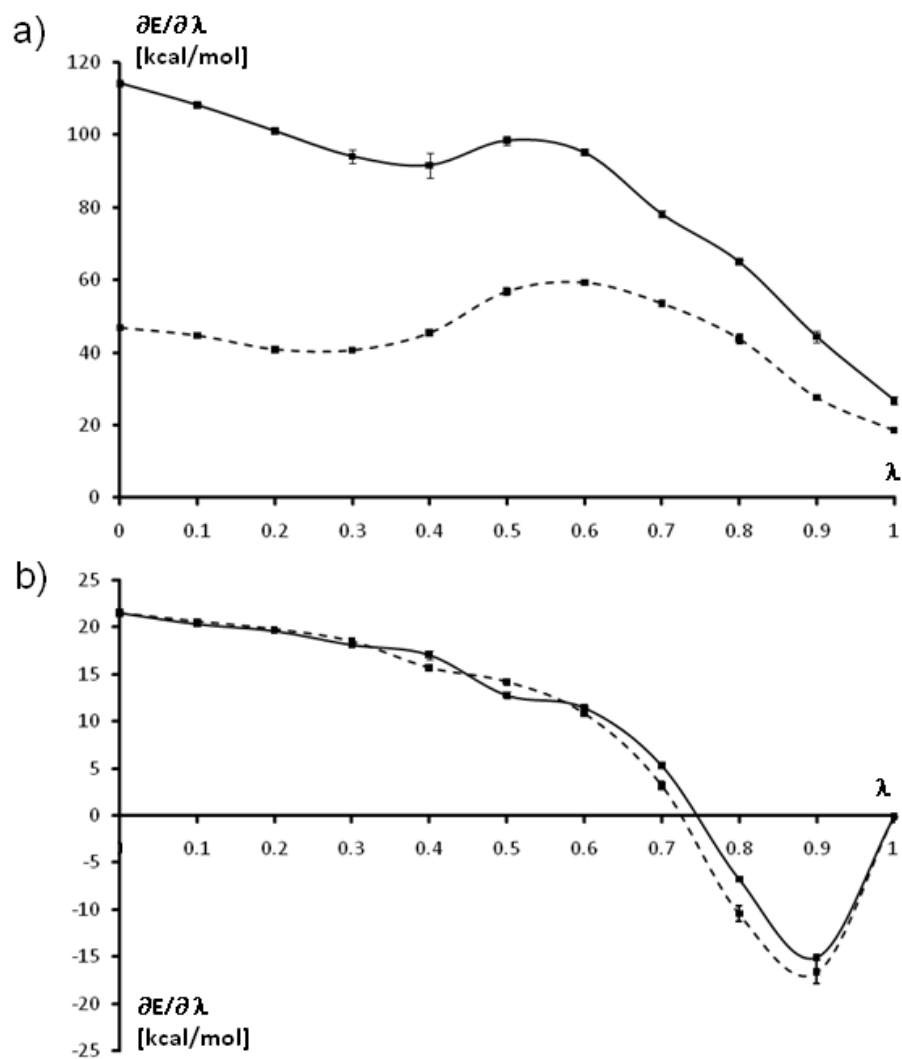

**Figure S3.** Values of  $\partial E / \partial \lambda$  as a function of  $\lambda$  for the Coulomb contribution (a) and the van der Waals contribution (b) of HTrp<sup>+</sup> (straight line) and Trp (broken line) in BMIM-BF<sub>4</sub>. Integrals of these curves were used to determine the solvation free energy. Error bars are displayed for each  $\lambda$ -point.

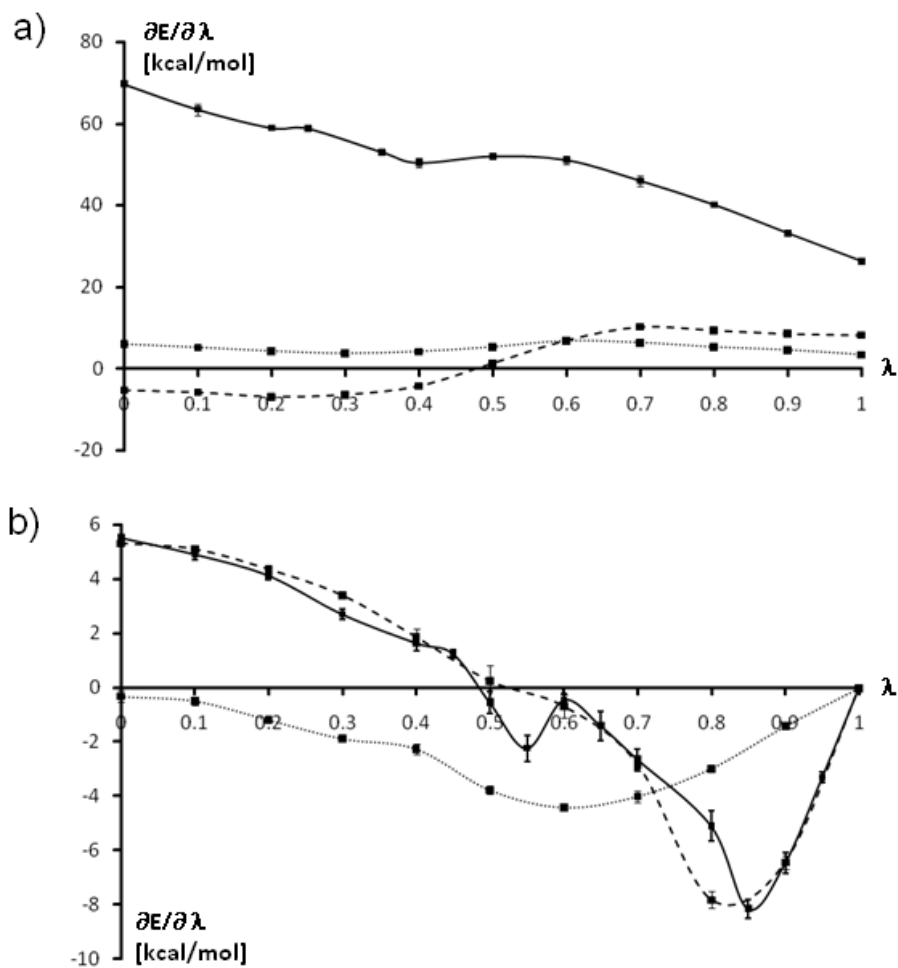

**Figure S4.** Values of  $\partial E / \partial \lambda$  as a function of  $\lambda$  for the Coulomb contribution (a) and the van der Waals contribution (b) of  $\text{PF}_6^-$  (straight line),  $\text{PF}_5$  (broken line) and HF (dotted line) in BMIM- $\text{PF}_6$ . Integrals of these curves were used to determine the solvation free energy. Error bars are displayed for each  $\lambda$ -point.

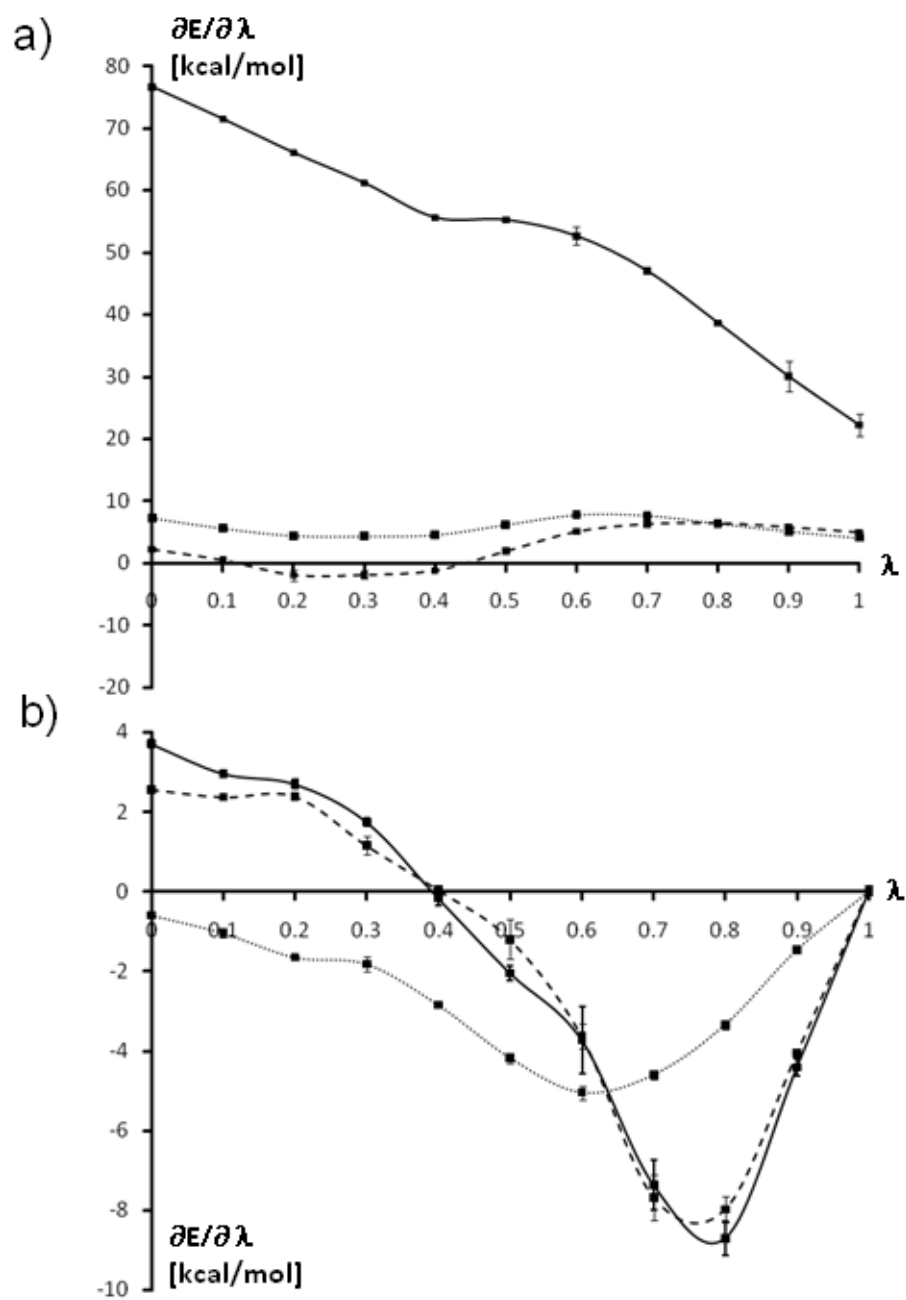

**Figure S5.** Values of  $\partial E / \partial \lambda$  as a function of  $\lambda$  for the Coulomb contribution (a) and the van der Waals contribution (b) of  $\text{BF}_4^-$  (straight line),  $\text{BF}_3$  (broken line) and HF (dotted line) in BMIM- $\text{BF}_4$ . Integrals of these curves were used to determine the solvation free energy. Error bars are displayed for each  $\lambda$ -point.
